# Supplementary material for: Reassessment of the Triassic archosauriformScleromochlus taylori: neither runner nor biped, but hopper
Source: PeerJ journal article supplement (doi:10.7717/peerj.8418), 2020-02-19

+

OUTOUT CONSENSUS TREES FROM BENNETT'S PAUP\* ANALYSIS  
OF EZCURRA'S 79 TAXON DATA MATRIX PLUS *SCLEROMOCHLUS*

Analysis #1

Strict consensus of 96 trees:

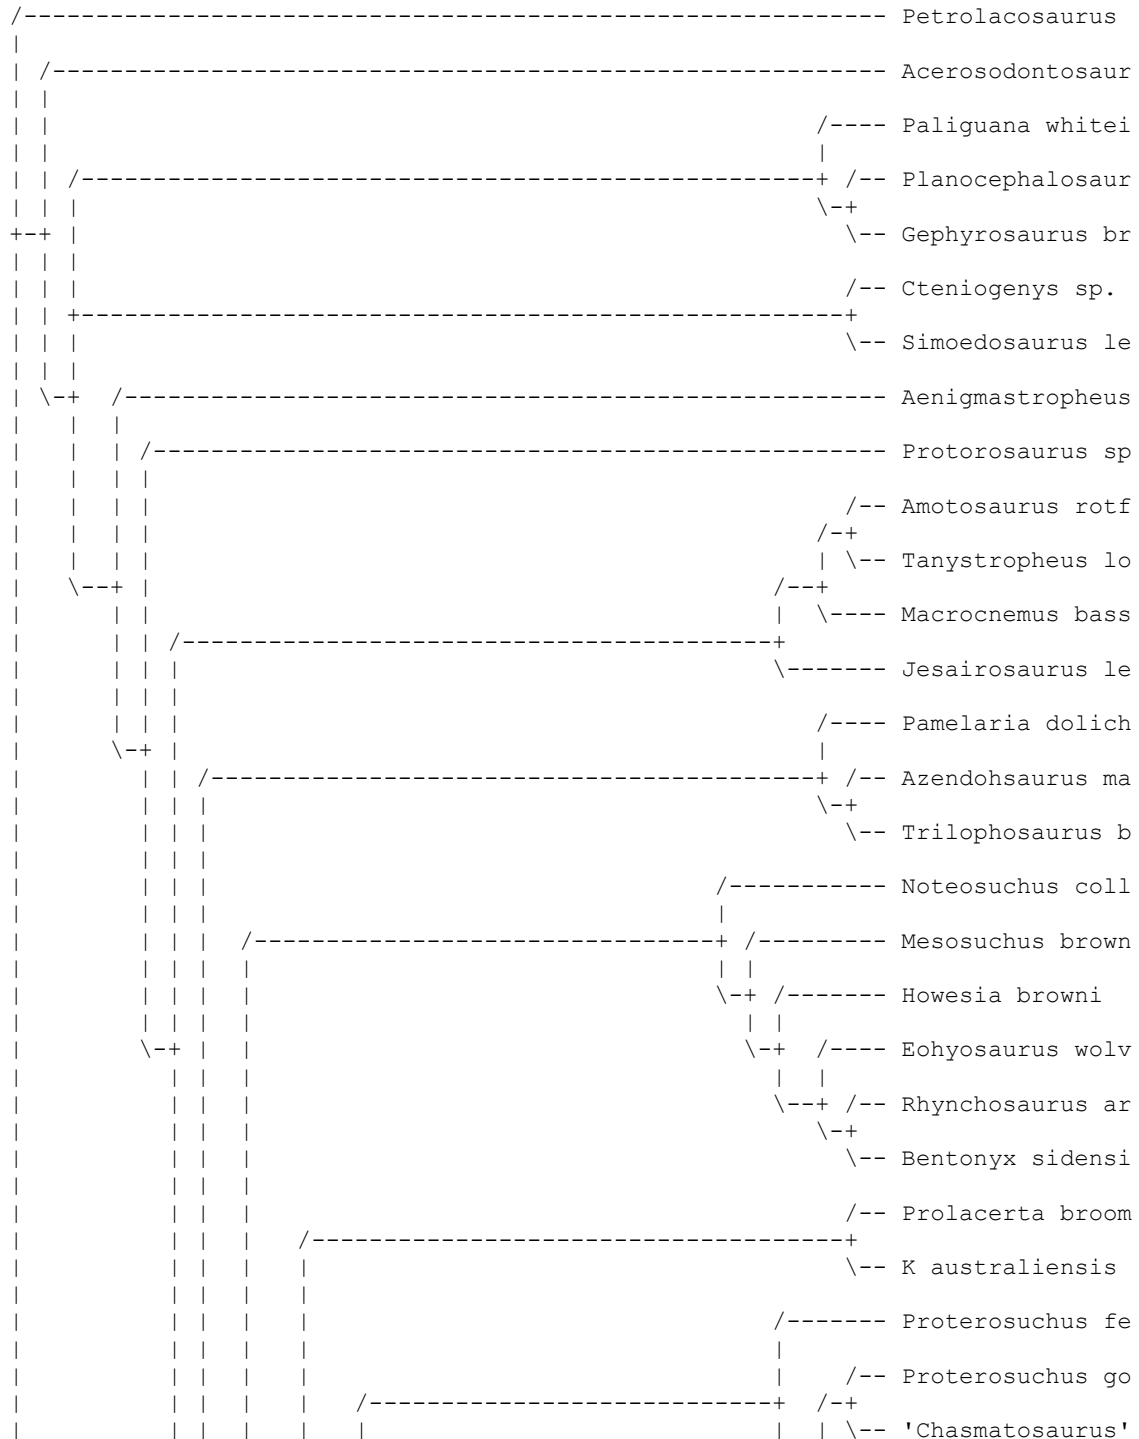

+

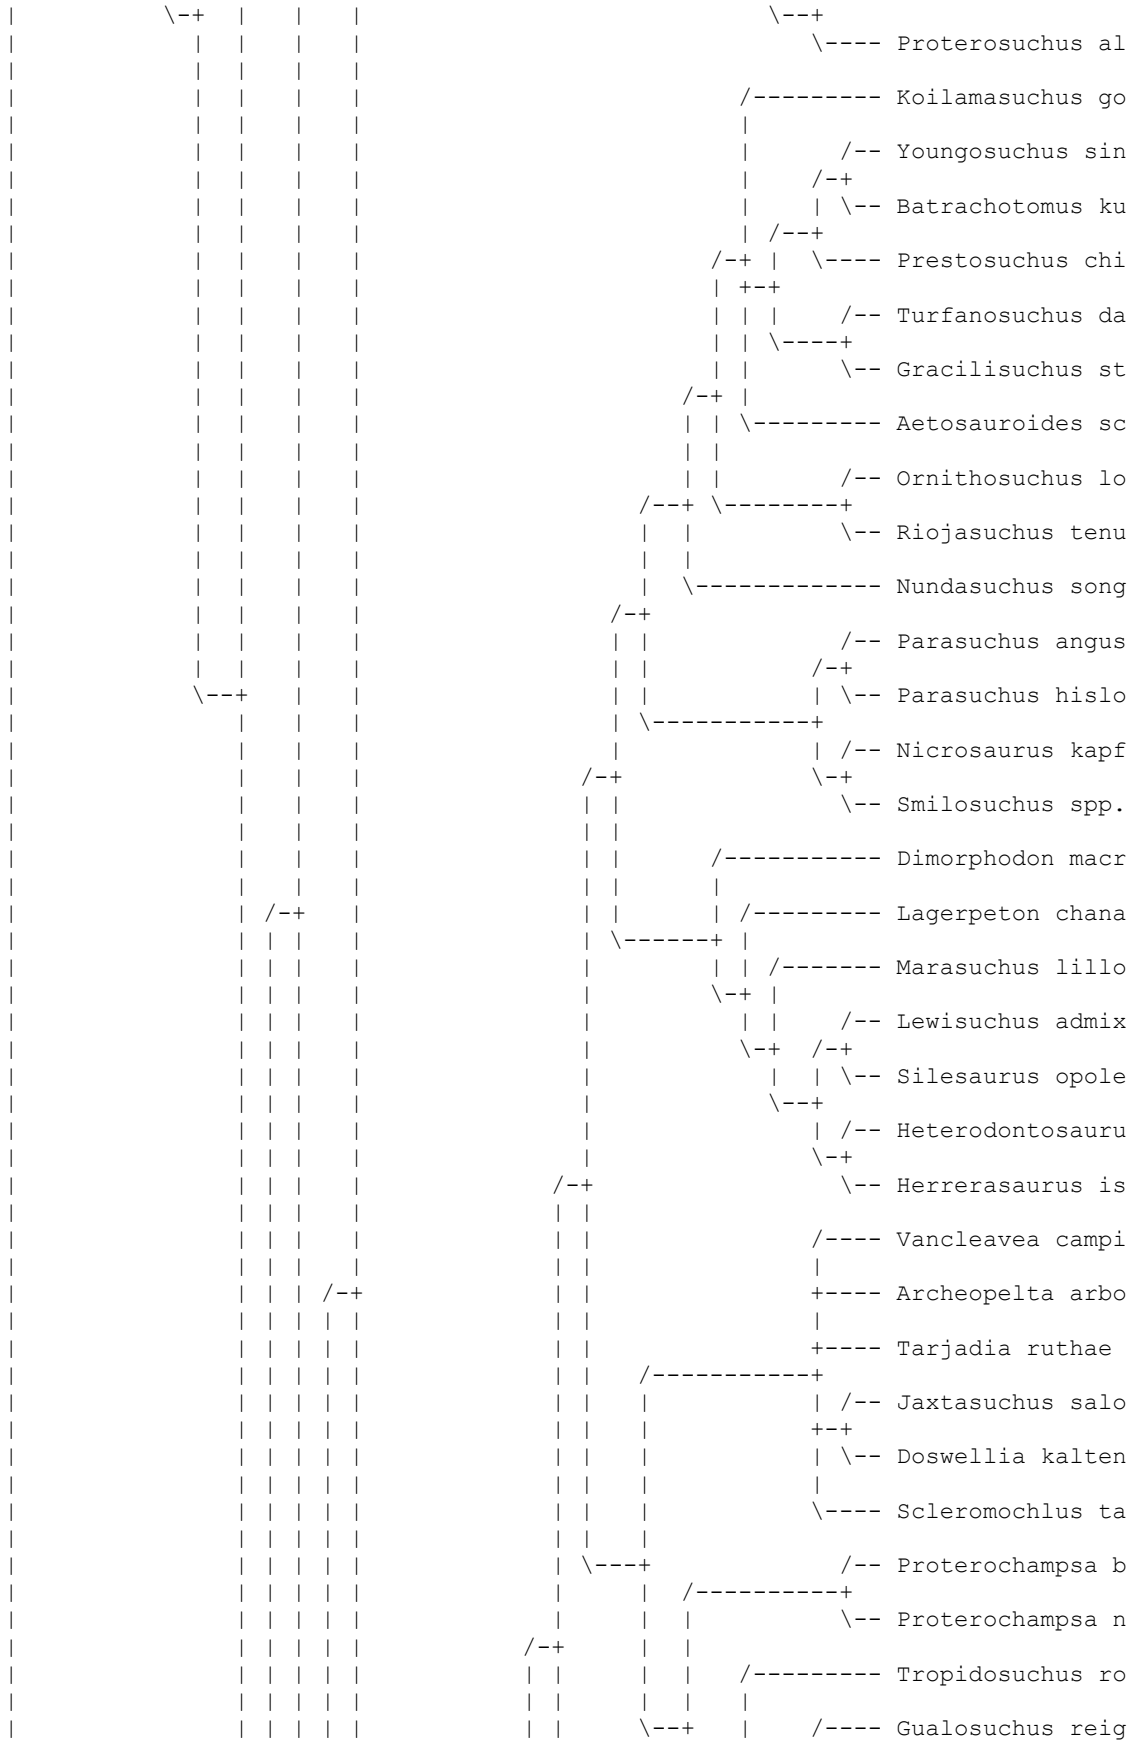

+

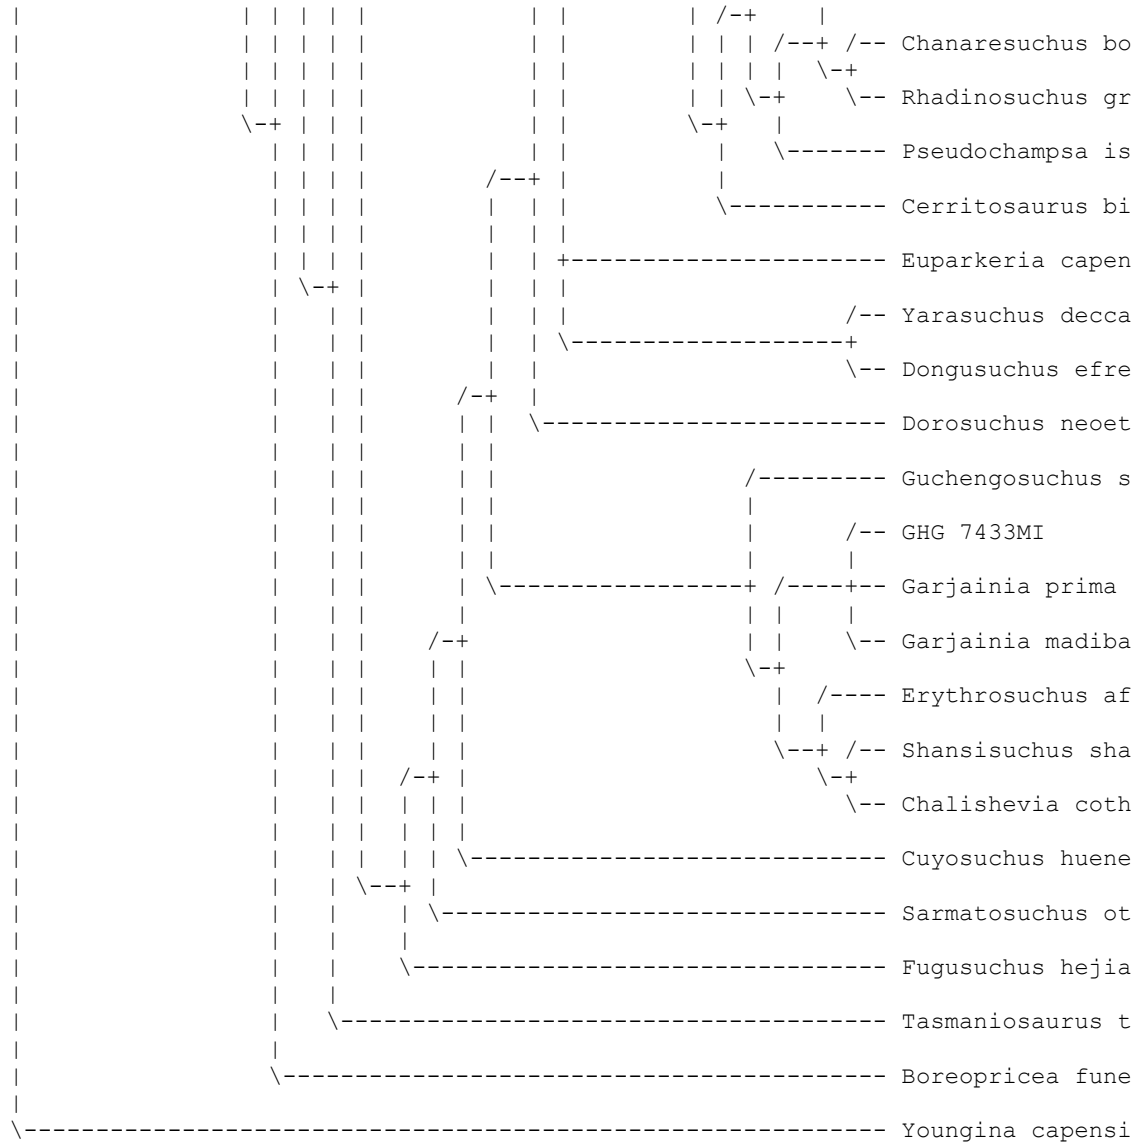

50% Majority-rule consensus of 96 trees

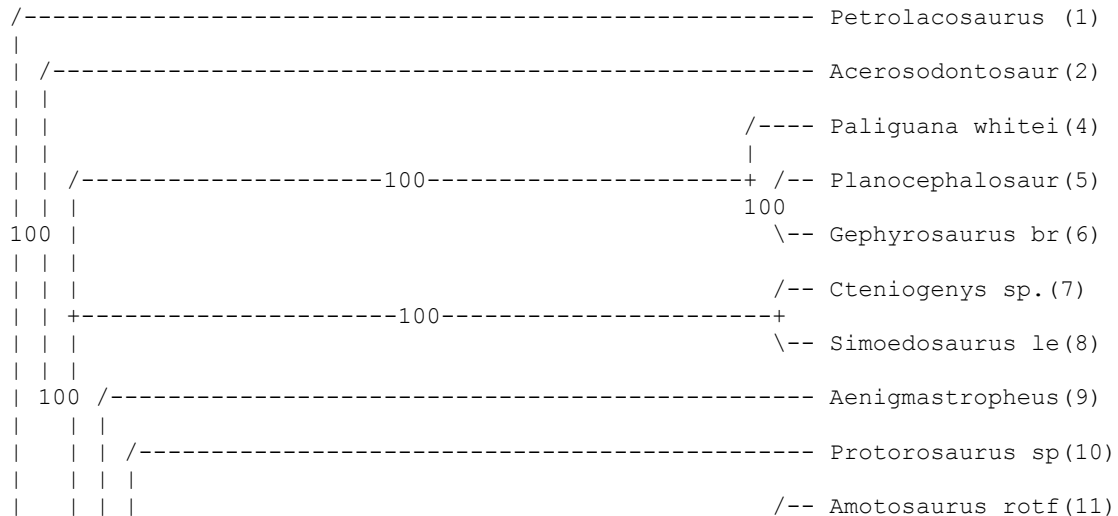

+

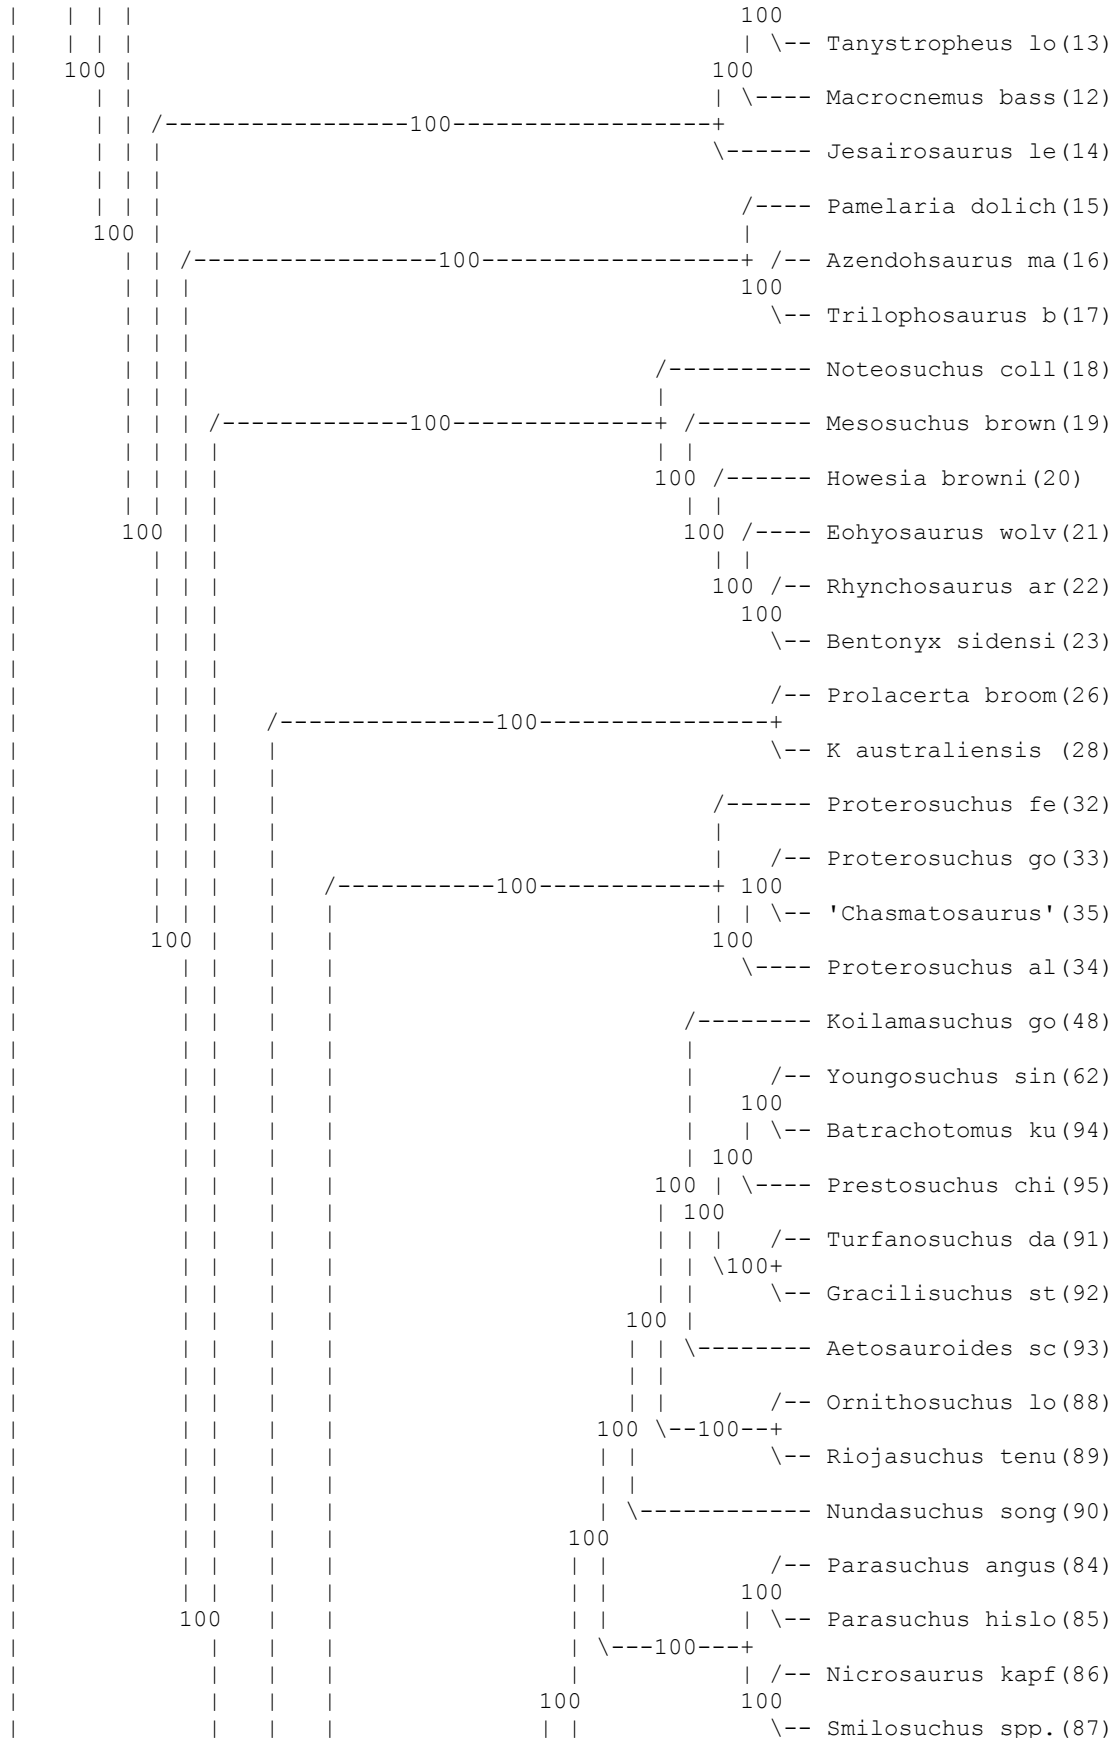





+

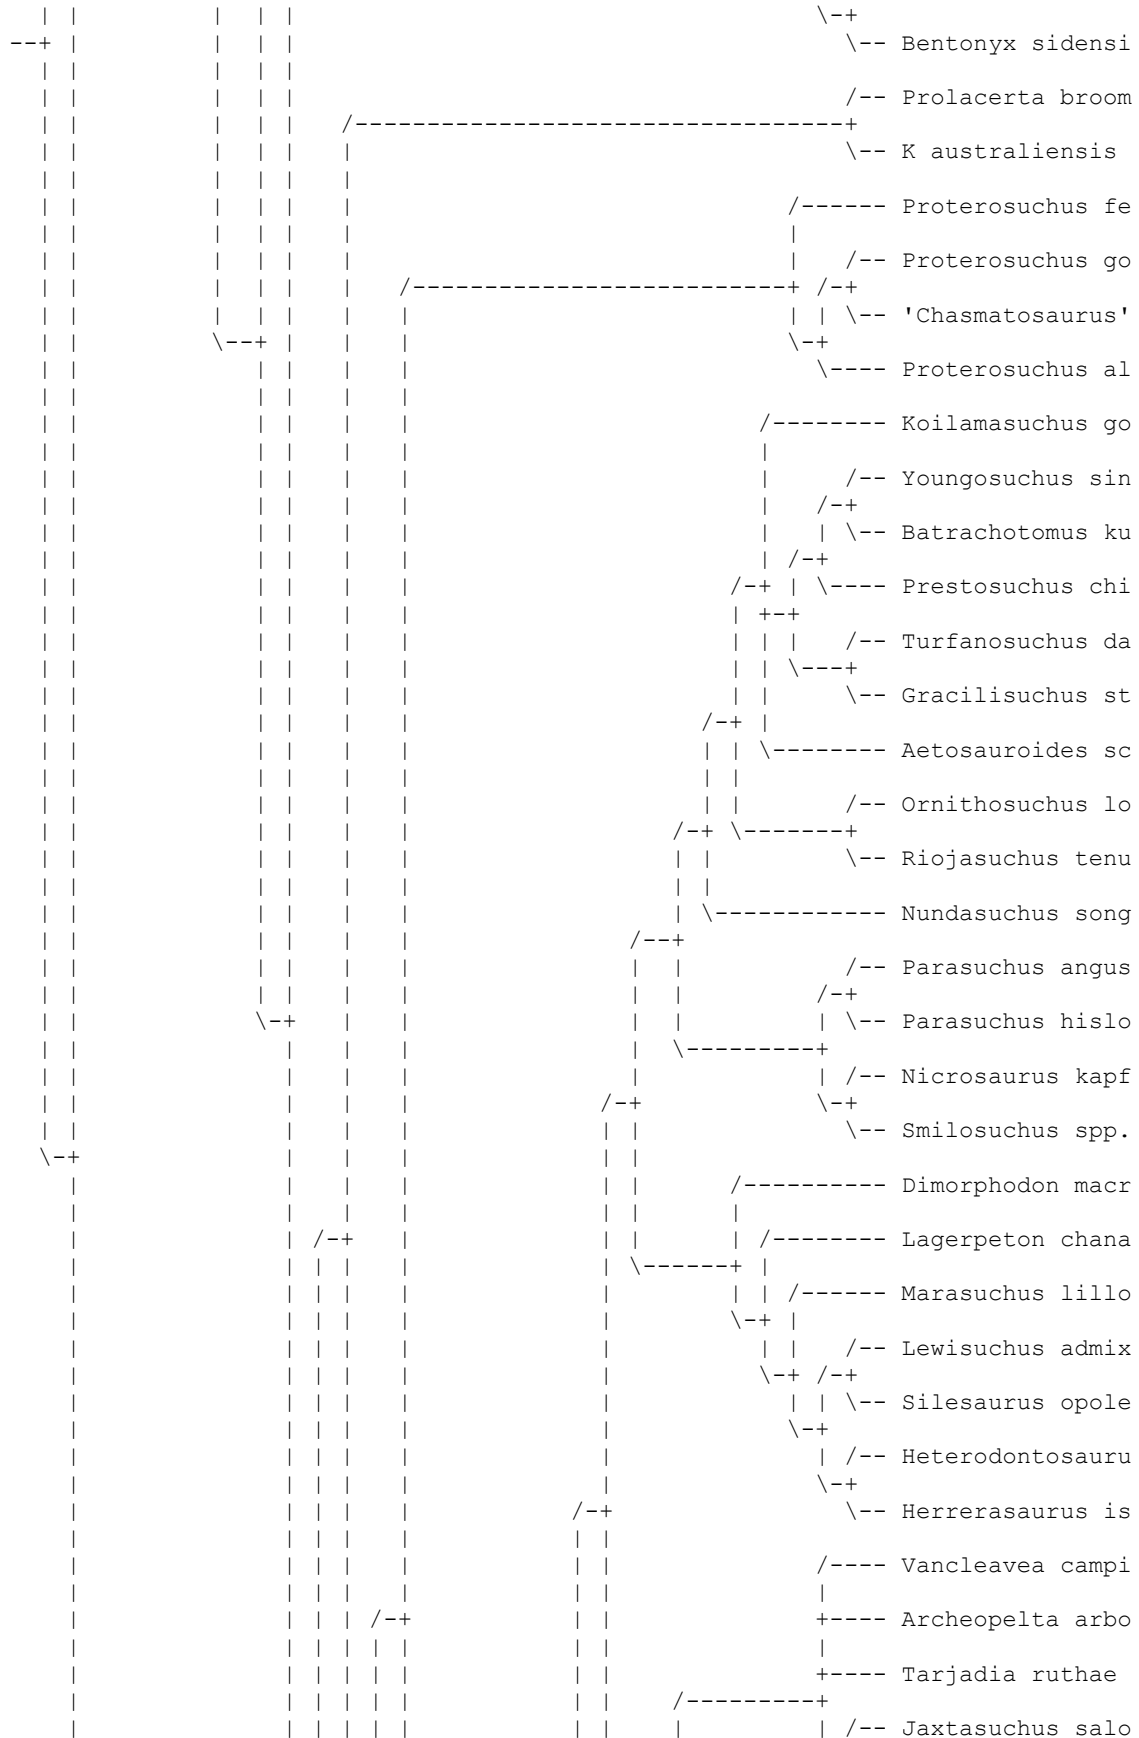

+

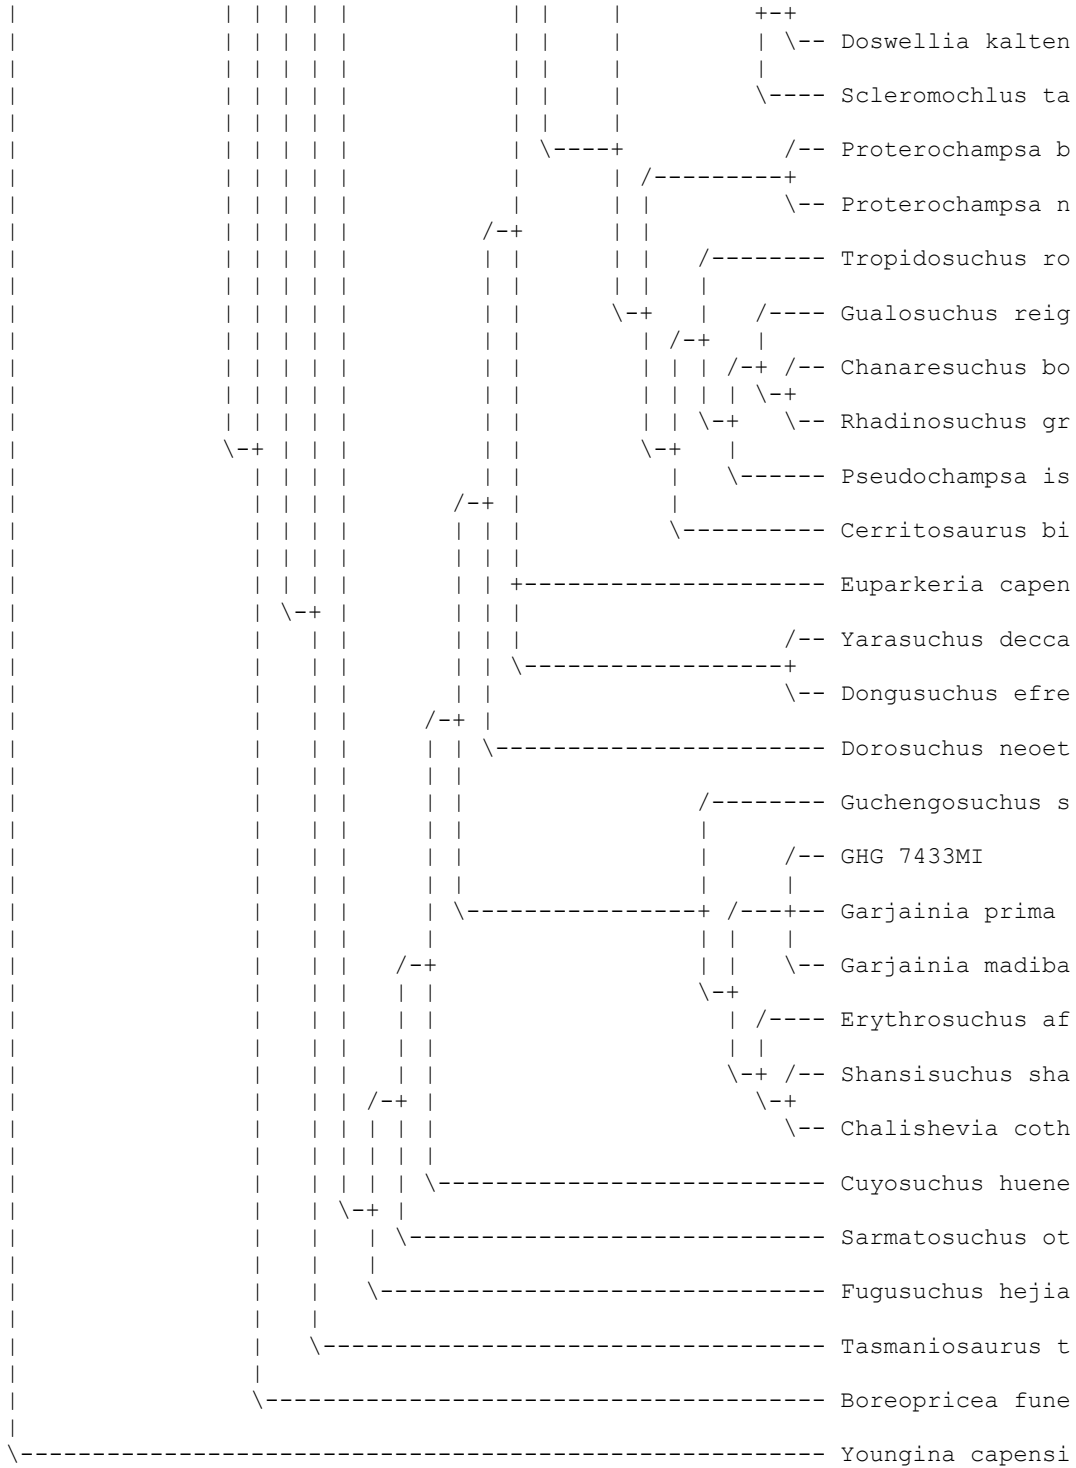

50% Majority-rule consensus of 1000 trees

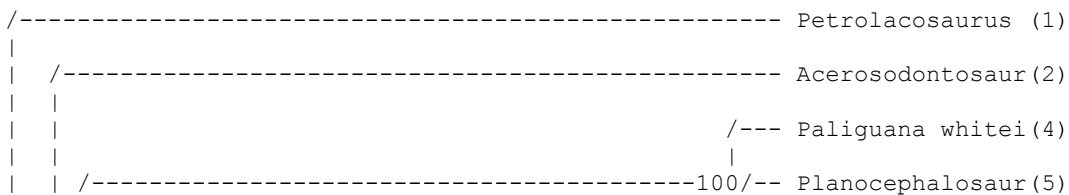



+

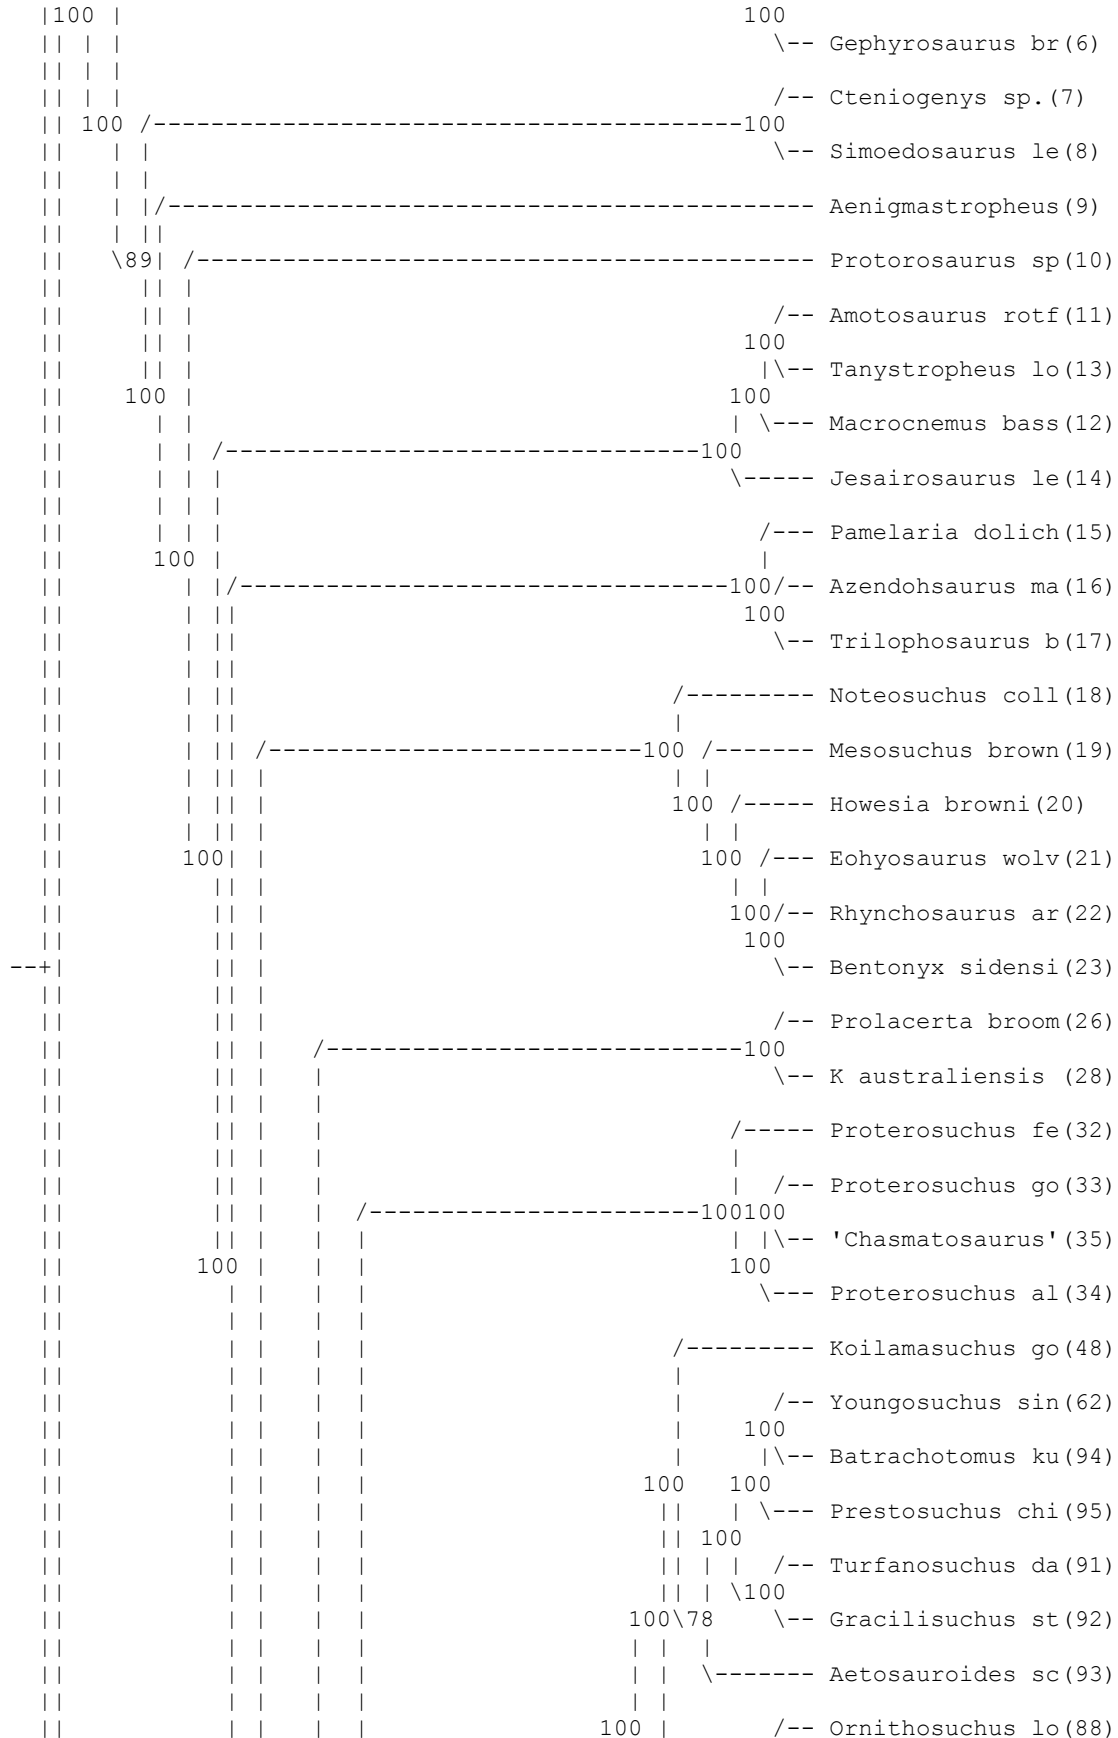



+

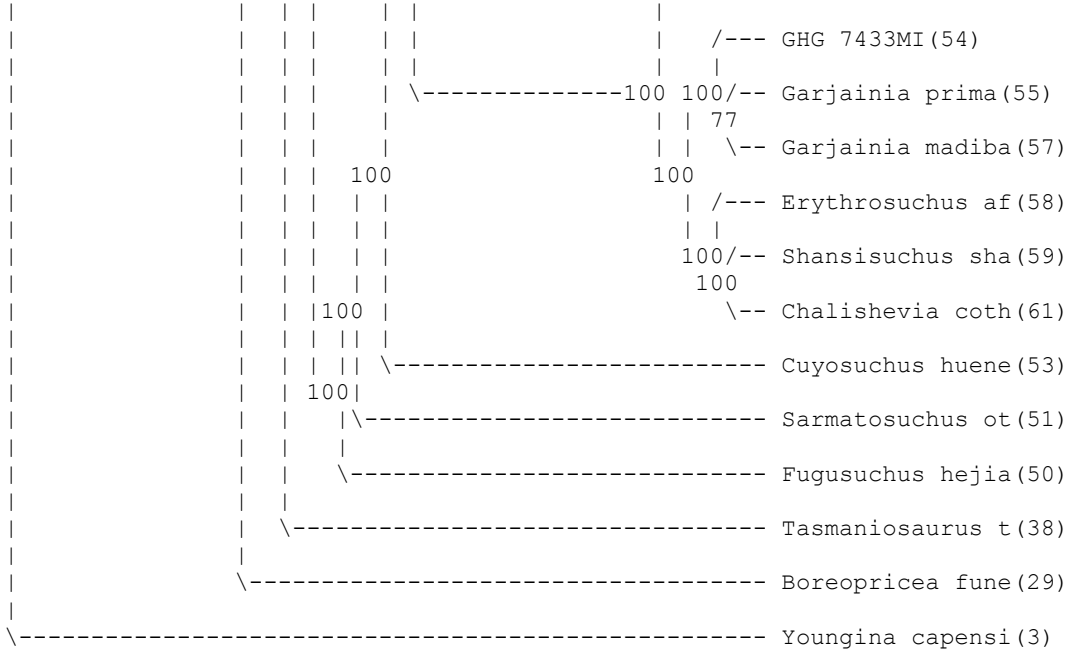


---

**Analysis #3 with Chars 558 & 559 Irreversible & Weighted 2**

---

Strict consensus of 1000 trees:

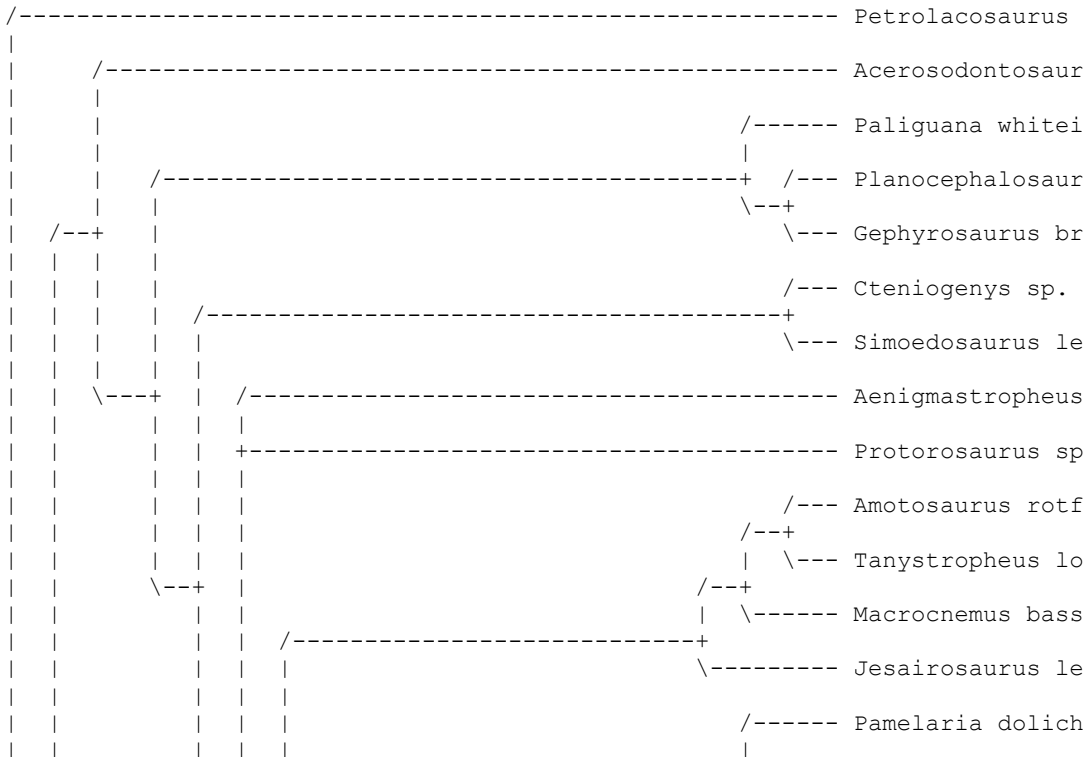

+

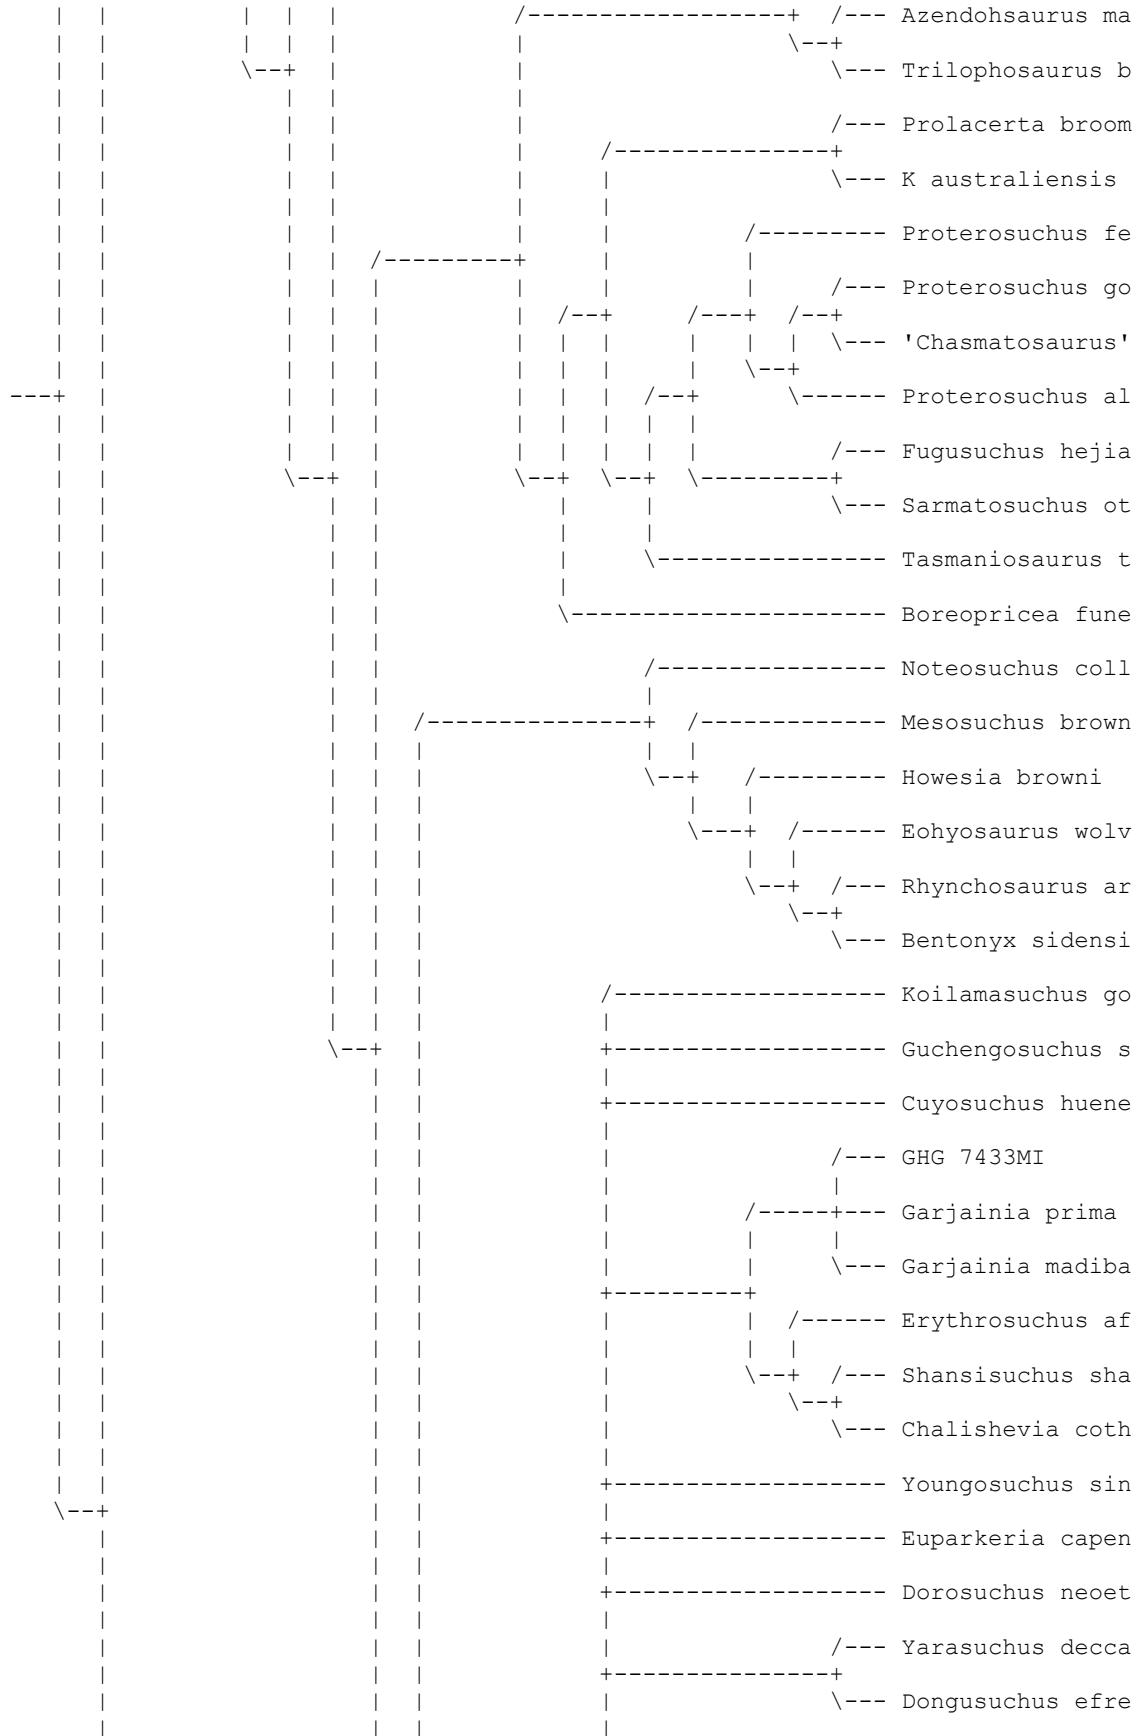

+

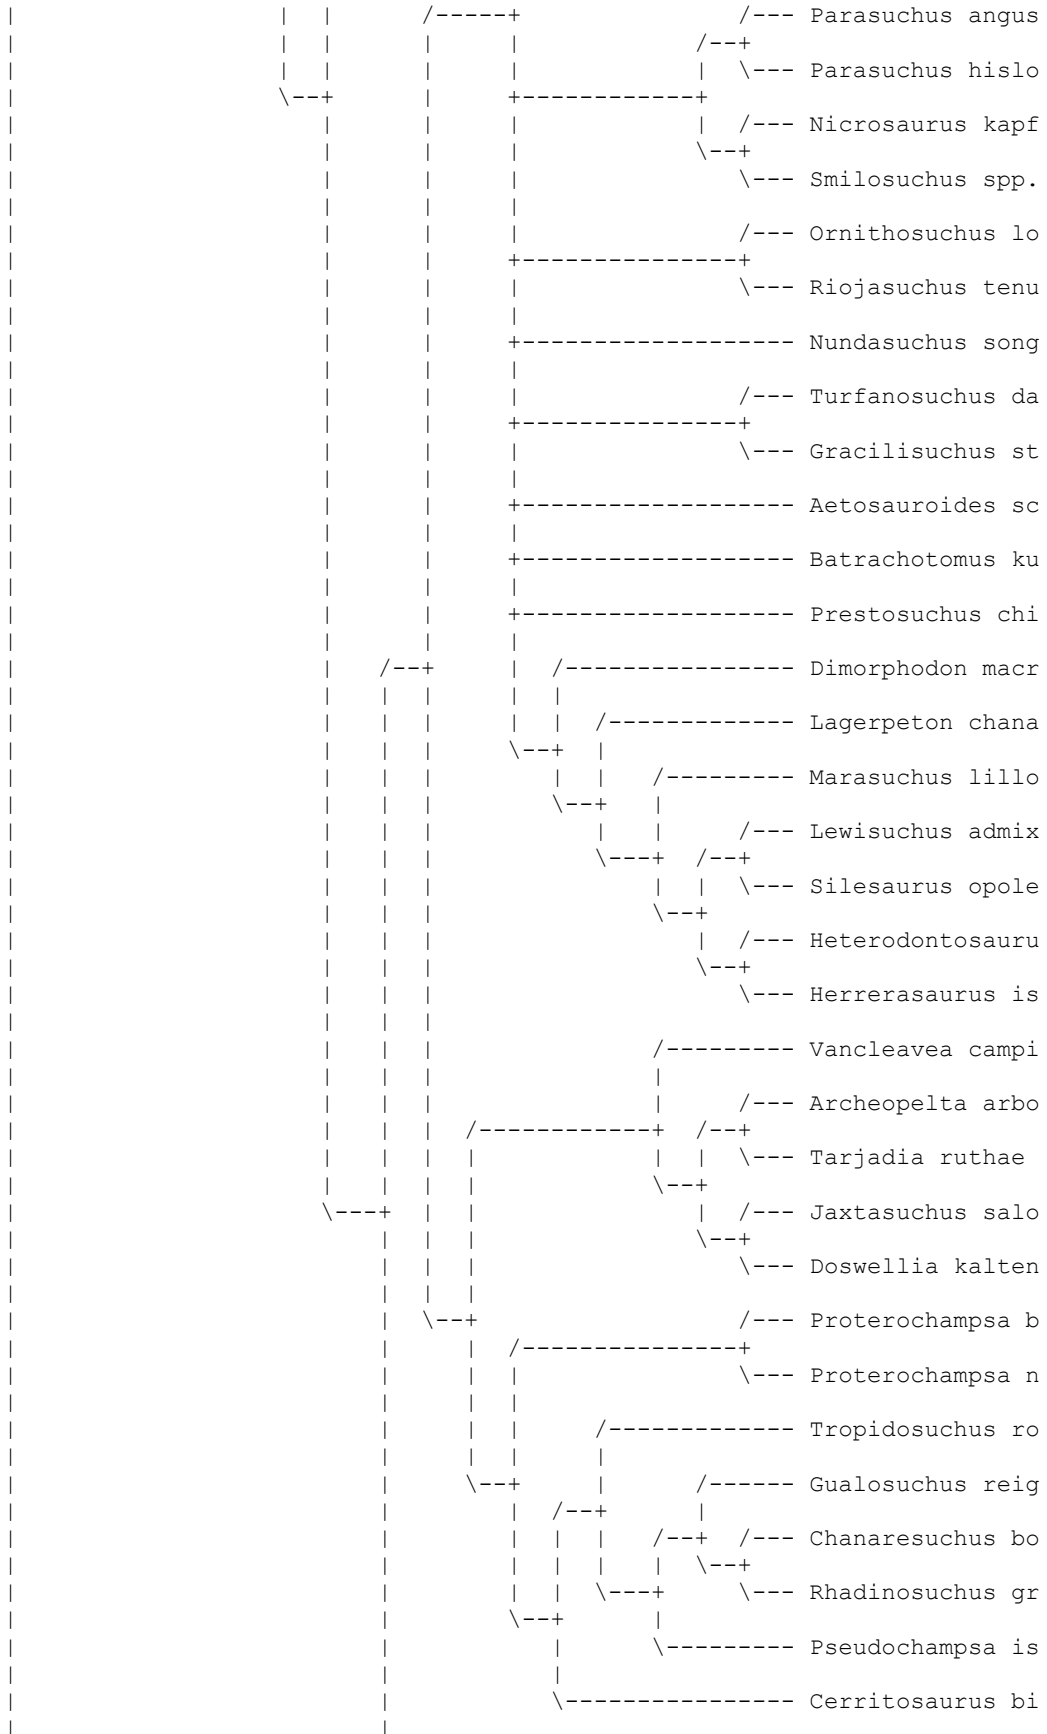

+

```

|
| \----- Scleromochlus ta
| \----- Youngina capensi

```

50% Majority-rule consensus of 1000 trees

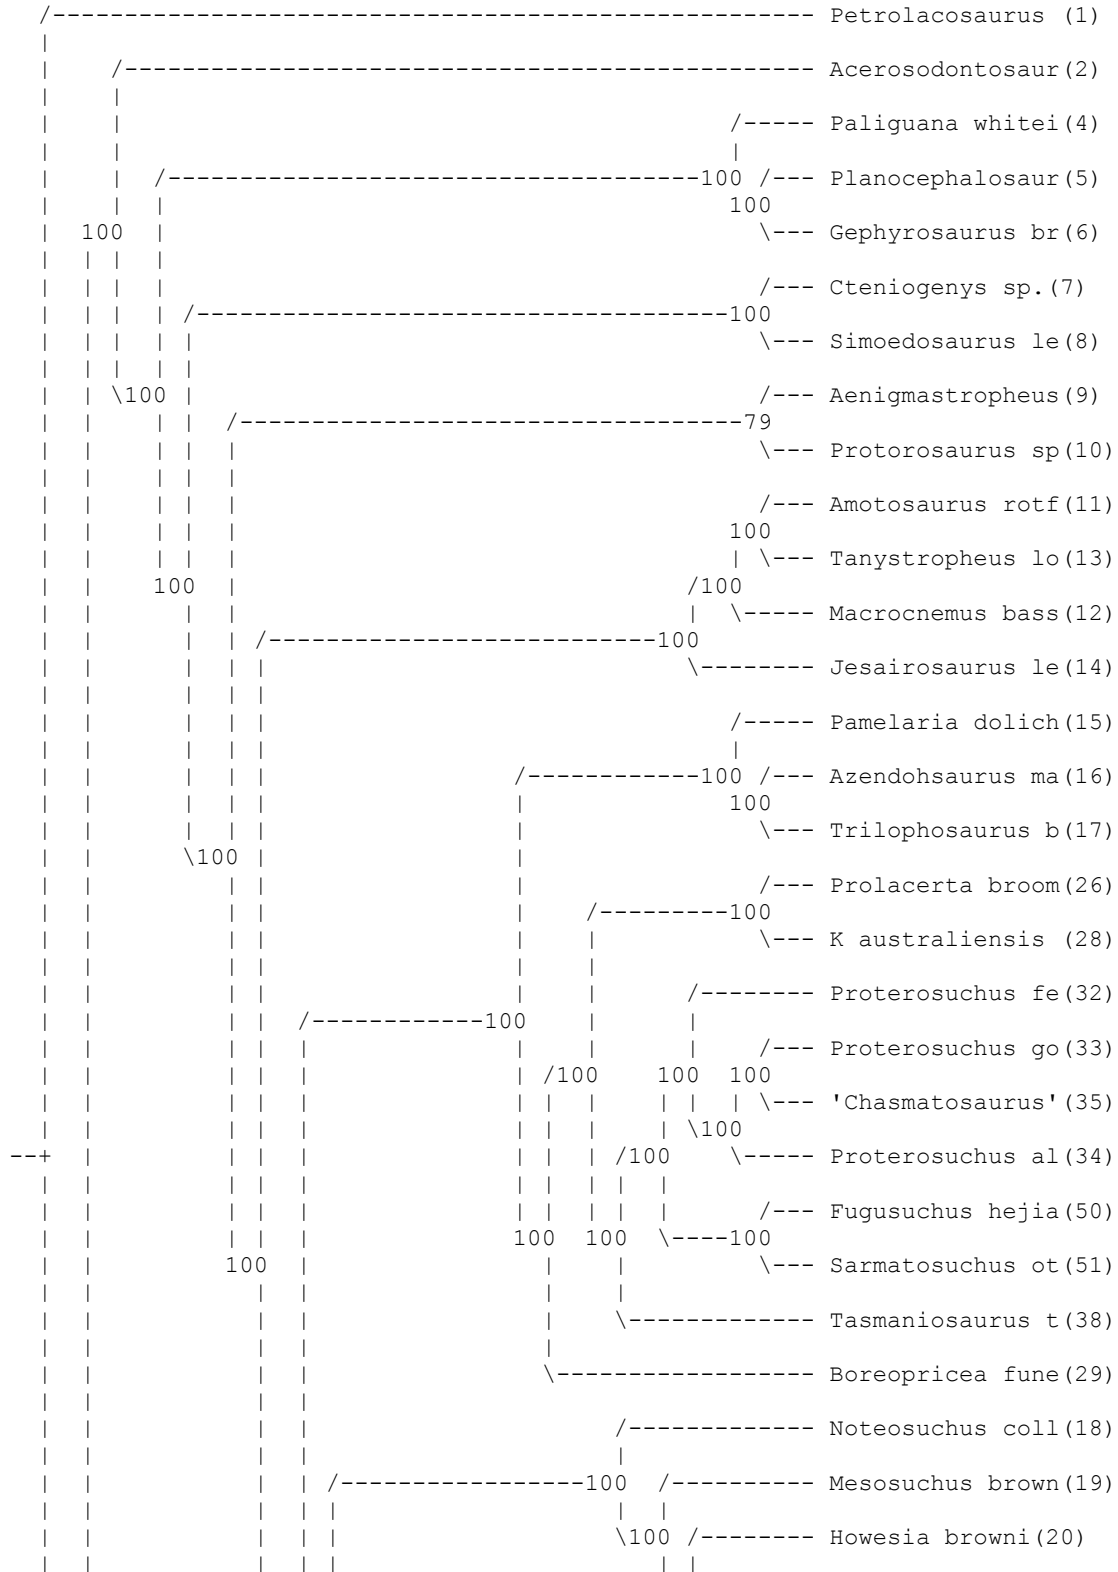

+

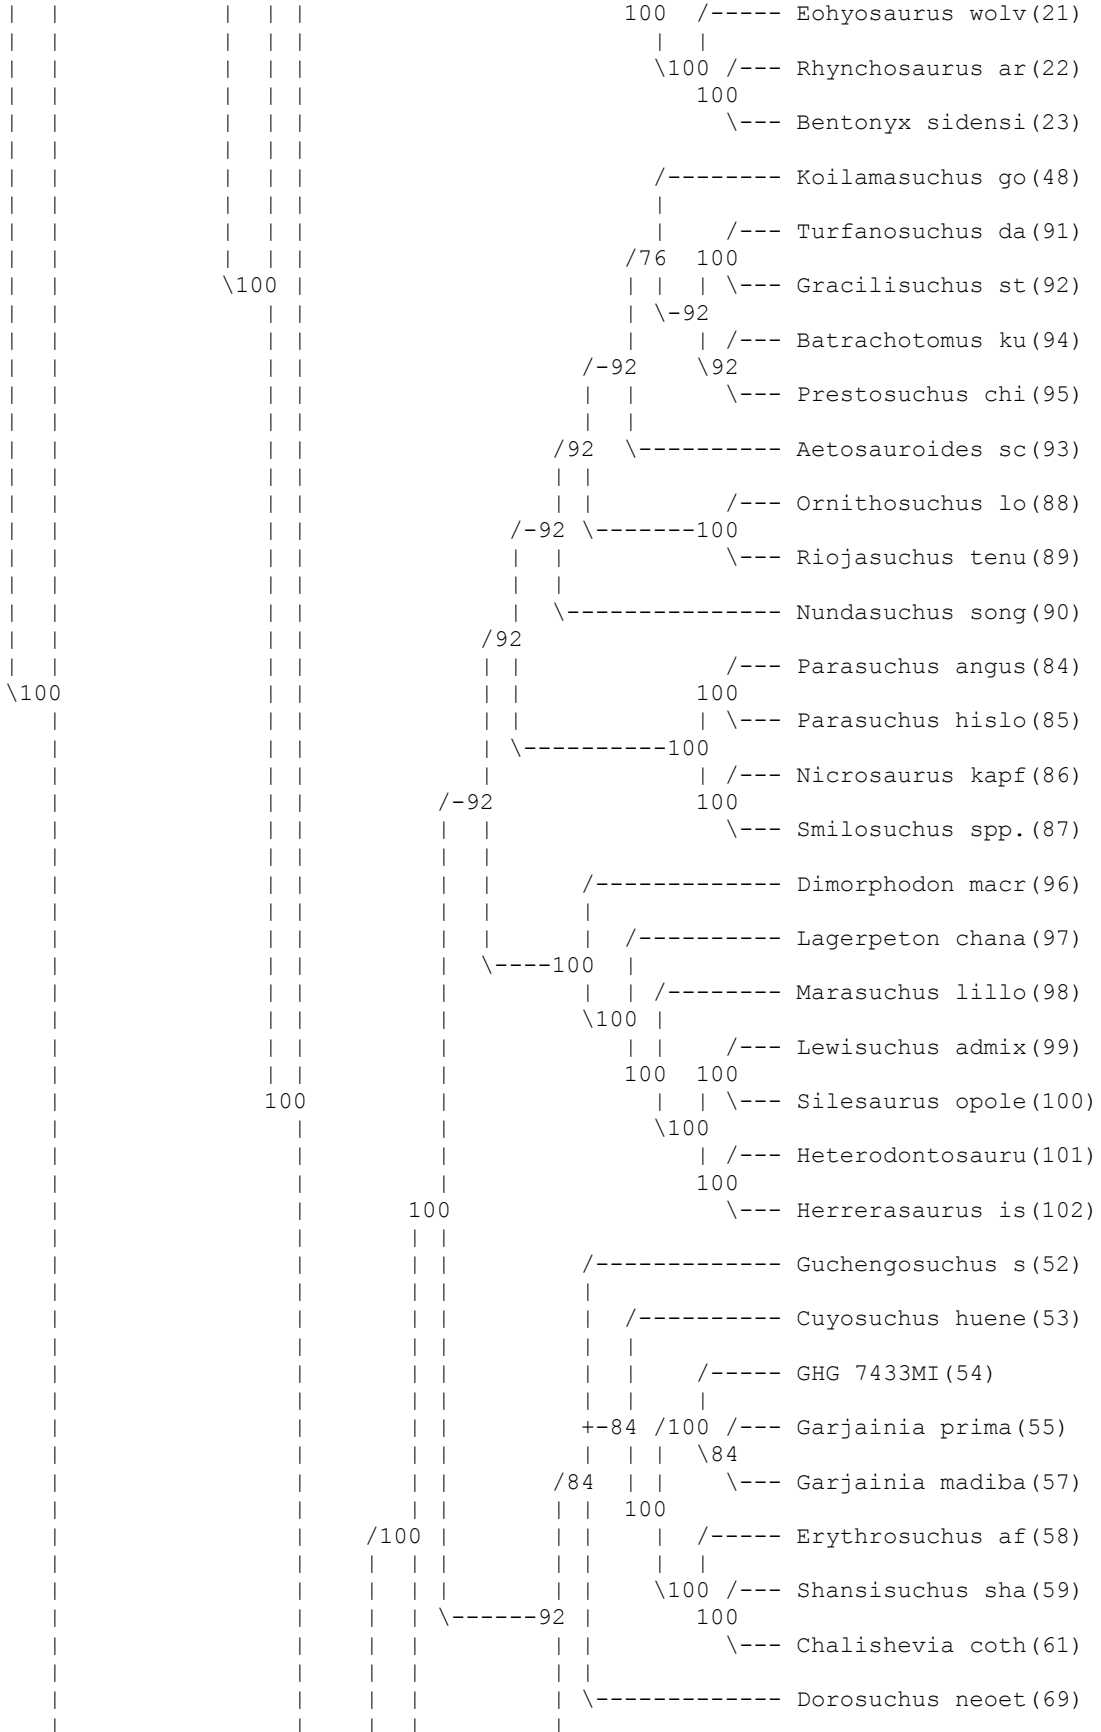

+

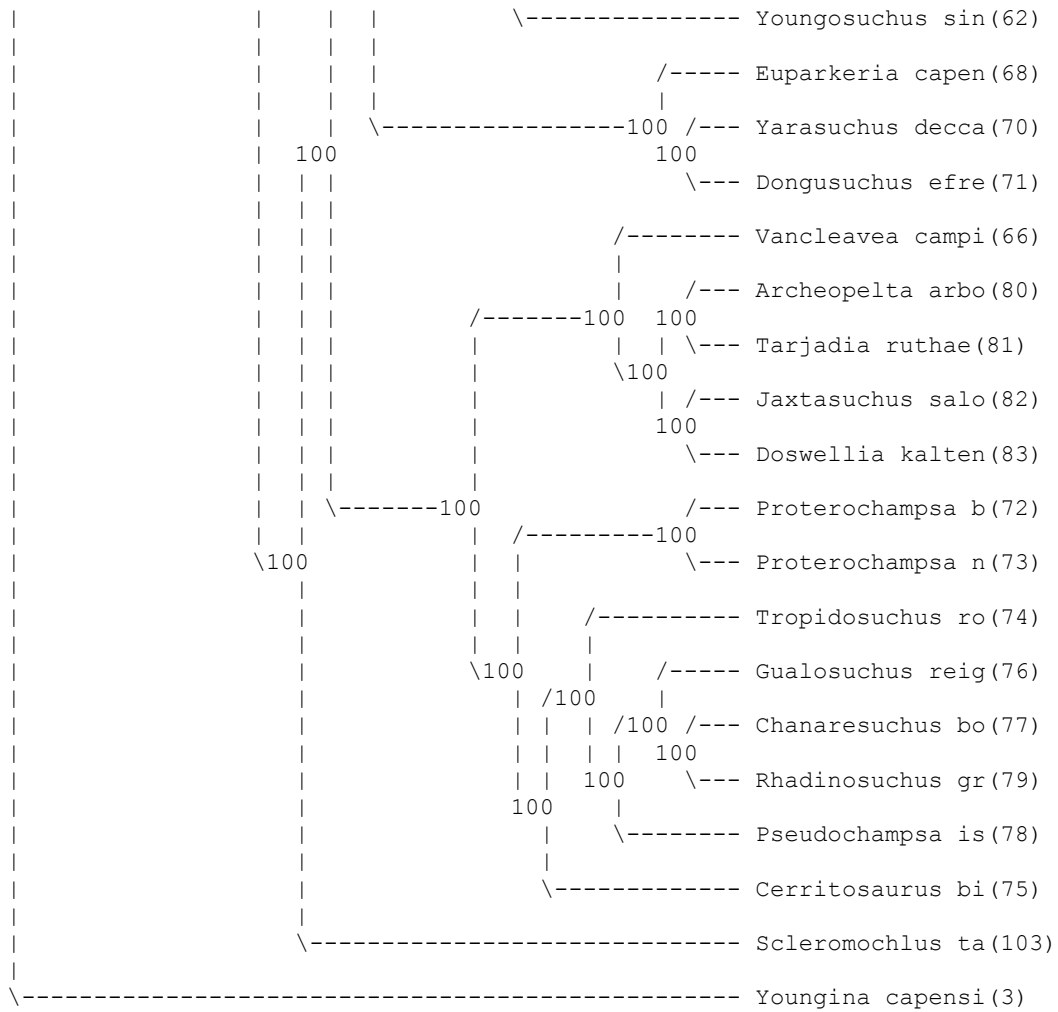

Supplement: Bennett-Scleromochlus_-_PAUP_Analysis_Consensus_Trees.pdf [file Bennett-Scleromochlus_-_PAUP_Analysis_Consensus_Trees.pdf]
